# Supplementary material for: Superior performance and stability of anion exchange membrane water electrolysis: pH-controlled copper cobalt oxide nanoparticles for the oxygen evolution reaction
Source: Royal Society of Chemistry journal article supplement (doi:10.1039/c9ta13137j), 2020-01-01
Supplement: c9ta13137j1.pdf [file c9ta13137j1.pdf]

## Electronic Supplementary Information for

# Superior performance and stability of anion exchange membrane water electrolysis: pH-controlled copper cobalt oxide nanoparticle for oxygen evolution reaction

Myeong Je Jang<sup>‡ab</sup>, Juchan Yang<sup>‡a</sup>, Jongmin Lee<sup>‡c</sup>, Yoo Sei Park<sup>ad</sup>, Jaehoon Jeong<sup>a</sup>, Seong Min Park<sup>ad</sup>, Jae-Yeop Jeong<sup>ad</sup>, Yadong Yin<sup>e</sup>, Min-Ho Seo<sup>\*c</sup>, Sung Mook Choi<sup>\*a</sup>, Kyu Hwan Lee<sup>\*ab</sup>

<sup>a</sup> Surface Technology Department, Korea Institute of Materials Science, 797 Changwon-Daero, Sungsan-gu, Changwon, 51508, Republic of Korea

<sup>b</sup> Advanced Materials Engineering, Korea University of Science and Technology (UST), 217 Gajeong-ro, Yuseong-gu, Daejeon, 34113, Republic of Korea

<sup>c</sup> Buan Fuel Cell Center, New and Renewable Energy Institute, Korea Institute of Energy Research (KIER), 20-41, Sinjaesaeneogiro-ro, Haseo-myeon, Buan-gun, 56332, Republic of Korea

<sup>d</sup> Department of Materials Science and Engineering, Pusan National University, Busan, 46241, Republic of Korea

<sup>e</sup> Department of Chemistry, Center for Catalysis, University of California Riverside, Riverside, California 92521, United States

Table S1. The atomic percentage of Cu and Co from TEM-EDS, XPS and ICP-MS.

| Catalysts | TEM-EDS<br>Cu (at.%) | TEM-EDS<br>Co (at.%) | XPS<br>Cu (at.%) | XPS<br>Co (at.%) | ICP-MS<br>Cu (at.%) | ICP-MS<br>Co (at.%) |
|-----------|----------------------|----------------------|------------------|------------------|---------------------|---------------------|
| CCO-8     | 85.8                 | 14.2                 | 64.3             | 35.7             | 74.0                | 26.0                |
| CCO-9     | 74                   | 26                   | -                | -                |                     |                     |
| CCO-9.5   | 25.2                 | 74.8                 | 25.8             | 74.2             | 47.7                | 52.3                |
| CCO-11    | 16.2                 | 83.8                 | 16.18            | 83.82            | 4.5                 | 95.5                |

Table S2. Comparison of the OER activity of Co-based electrocatalysts in alkaline electrolytes.

| Electrocatalyst                                                        | Catalyst loading (mg cm <sup>-2</sup> ) | Substrate | Electrolyte | Overpotential at 10 mA cm <sup>-2</sup> (mV) | Tafel slope (mV dec <sup>-1</sup> ) | Ref.      |
|------------------------------------------------------------------------|-----------------------------------------|-----------|-------------|----------------------------------------------|-------------------------------------|-----------|
| NiCo-r                                                                 | 0.285                                   | GCE       | 1 M KOH     | 320                                          | 30                                  | [1]       |
| CoO <sub>x</sub> -4h                                                   | 0.5                                     | GCE       | 1 M KOH     | 306                                          | 65                                  | [2]       |
| Co <sub>3</sub> O <sub>4</sub> /NiCo <sub>2</sub> O <sub>4</sub> DSNCs | 1                                       | Ni foam   | 1 M KOH     | 340                                          | 88                                  | [3]       |
| Co <sub>3</sub> O <sub>4</sub> nanowire                                | 0.136                                   | GCE       | 1 M KOH     | 400                                          | 72                                  | [4]       |
| CoO hexagams                                                           | 0.28                                    | GCE       | 1 M KOH     | 269                                          | 64.4                                | [5]       |
| Ni-Co oxide                                                            | Not given                               | FTO       | 1 M NaOH    | 340                                          | 51                                  | [6]       |
| Ni-Co oxide cages                                                      | Not given                               | GCE       | 1 M KOH     | 380                                          | 50                                  | [7]       |
| Au@CoFeO <sub>x</sub>                                                  | Not given                               | GCE       | 1 M KOH     | 328                                          | 58                                  | [8]       |
| Au/mCo <sub>3</sub> O <sub>4</sub>                                     | Not given                               | GCE       | 0.1 M KOH   | 440                                          | 46                                  | [9]       |
| Cu <sub>0.5</sub> Co <sub>2.5</sub> O <sub>4</sub>                     | 0.5                                     | GCE       | 1 M KOH     | 285                                          | 79.2                                | This work |

Table S3. Comparison of the AEMWE reported performance with OER catalyst, HER catalyst, AEM, binder, electrolyte and temperature.

| OER catalyst Loading (mg cm <sup>-2</sup> )                        | HER catalyst Loading (mg cm <sup>-2</sup> )                  | AEM                                    | Binder                                                   | Electrolyte | Temperature [°C]       | Cell performance current density [mA cm <sup>-2</sup> ]/voltage [V] | Ref.      |
|--------------------------------------------------------------------|--------------------------------------------------------------|----------------------------------------|----------------------------------------------------------|-------------|------------------------|---------------------------------------------------------------------|-----------|
| Cu <sub>0.7</sub> Co <sub>2.3</sub> O <sub>4</sub> nanopowder (3)  | Ni nanopowder (2)                                            | Cranfield-membrane                     | Quaternized Poly(DMAEMA-co-TFEMA-co-BMA) (QPDTB) ionomer | 0.1 M KOH   | 55 (Bath)              | 150 / 2.0                                                           | [10]      |
| Cu <sub>0.7</sub> Co <sub>2.3</sub> O <sub>4</sub> nanopowder (3)  | Ni nanopowder (2)                                            | qPVB/OH <sup>-</sup>                   | qPVB/Cl ionomer                                          | 1 M KOH     | 55 (Bath)              | 100 / 2.0                                                           | [11]      |
| CuCoO <sub>x</sub> (36)                                            | Ni-CeO <sub>2</sub> -La <sub>2</sub> O <sub>3</sub> /C (7.4) | A201, Tokuyama                         | PTFE                                                     | 1 M KOH     | 55 (Bath)              | 450 / 1.8                                                           | [12]      |
| Ni-Fe nanopowder (Not given)                                       | Ni-Mo (40)                                                   | Quaternary ammonia polysulfone (xQAPS) | xQAPS                                                    | D.I.        | 70 (Bath)              | 250 / 1.8                                                           | [13]      |
| Li <sub>0.21</sub> Co <sub>2.79</sub> O <sub>4</sub> (2.5)         | Ni nanopowder (2)                                            | Cranfield-membrane                     | QPDTB ionomer                                            | D.I.        | 45 (Not given)         | 245 / 2.0                                                           | [14]      |
| Ce <sub>0.2</sub> MnFe <sub>1.8</sub> O <sub>4</sub> (3.5)         | Ni nanopowder (3.5)                                          | Fumasep® FAA-3-PK-130                  | AEM dissolved in dimethyl sulfoxide                      | D.I.        | 25 (Not given)         | 250 / 1.8                                                           | [15]      |
| Cu <sub>x</sub> Co <sub>3-x</sub> O <sub>4</sub> nanoparticles (3) | Pt/C (1)                                                     | Cranfield-membrane                     | Not given                                                | 1 M KOH     | 25 (Bath)              | 1000 / 1.8                                                          | [16]      |
| IrO <sub>2</sub> (2.9)                                             | Pt black (3.2)                                               | A201, Tokuyama                         | AS-4, Tokuyama                                           | 1 M KOH     | 50 (Cell)              | 399 / 1.8                                                           | [17]      |
| IrO <sub>2</sub> (4)                                               | Pt/C (0.4)                                                   | Fumasep® FAA-3-50, Fumatech            | FAA-3-Br, Fumatech                                       | 1 M KOH     | 50 (Cell)              | 1150 / 1.8                                                          | [18]      |
| IrO <sub>2</sub> (Not given)                                       | Pt/C (Not given)                                             | A201, Tokuyama                         | PTFE                                                     | 0.5 M KOH   | 50 (Not given)         | 1070 / 1.8                                                          | [19]      |
| Cu <sub>0.5</sub> Co <sub>2.5</sub> O <sub>4</sub> (10)            | Pt/C (1)                                                     | X37-50 T, Dioxide Materials            | PTFE                                                     | 1 M KOH     | 50 (Bath)<br>45 (Cell) | 1300 / 1.8                                                          | This work |

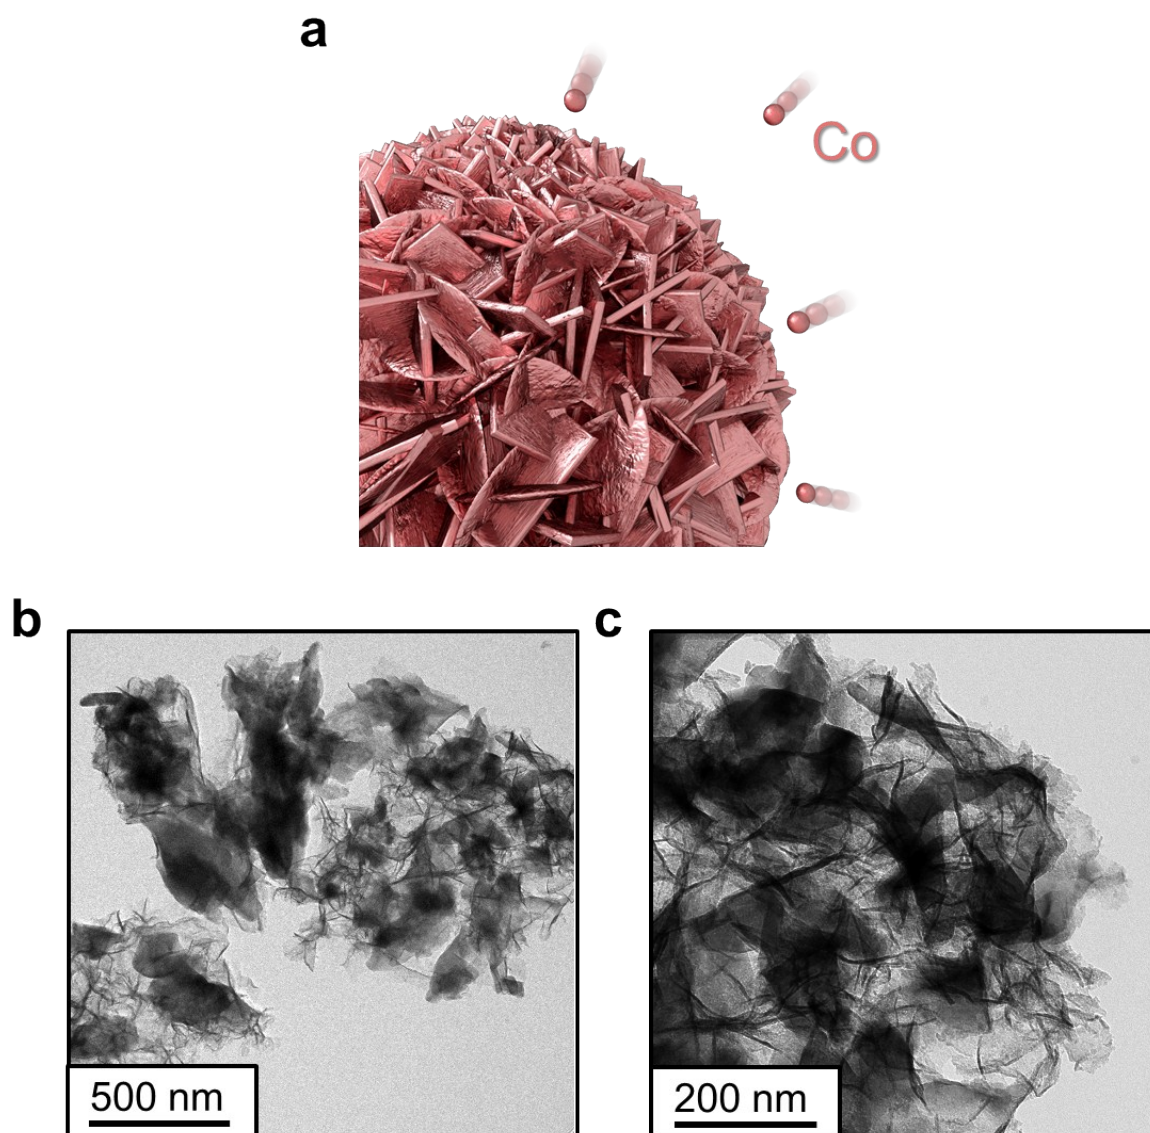

Fig. S1. (a) The schematic diagram showing the formation of Cu-Co hydroxide nanowalls. TEM image of CCO-9.5 with magnification (b) $\times 12,000$  and (c) $\times 30,000$ .

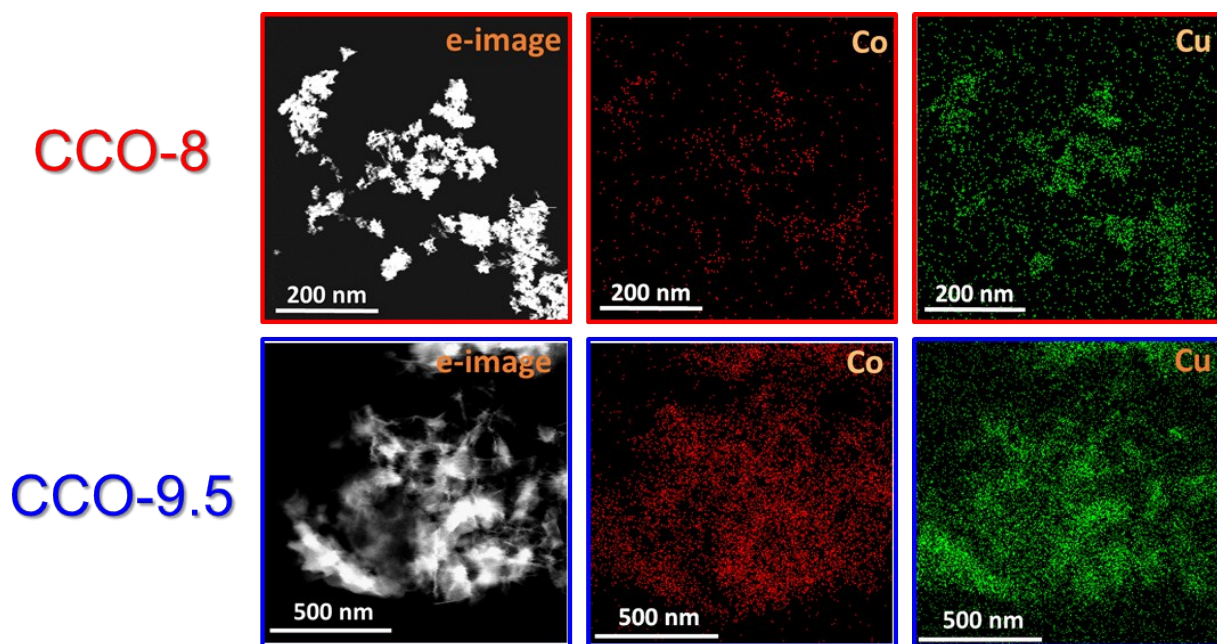

Fig. S2. Elemental mapping of the electron image, Co and Cu of the CCO-8 and CCO-9.5.

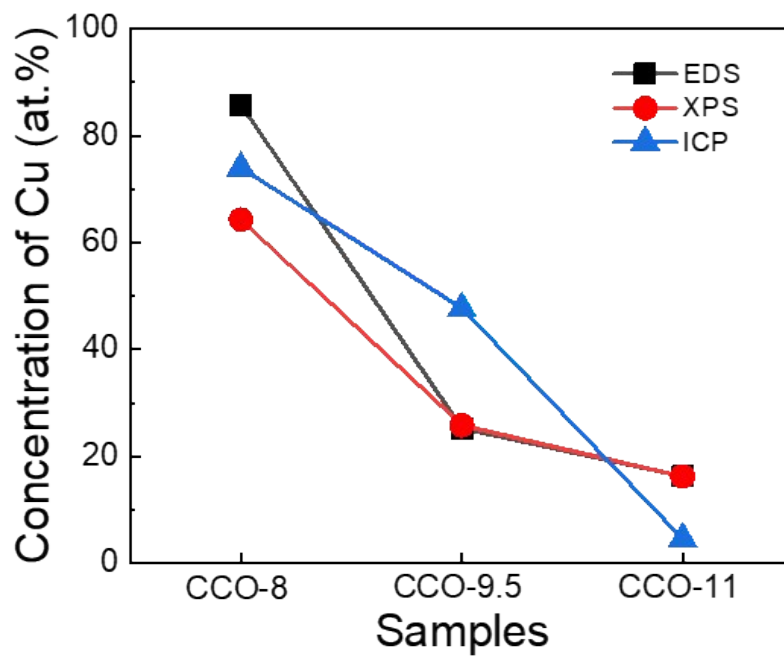

Fig. S3. The atomic percentage of Cu in CCO-8, CCO-9.5 and CCO-11 electrocatalyst from TEM-EDS, XPS and ICP-MS.

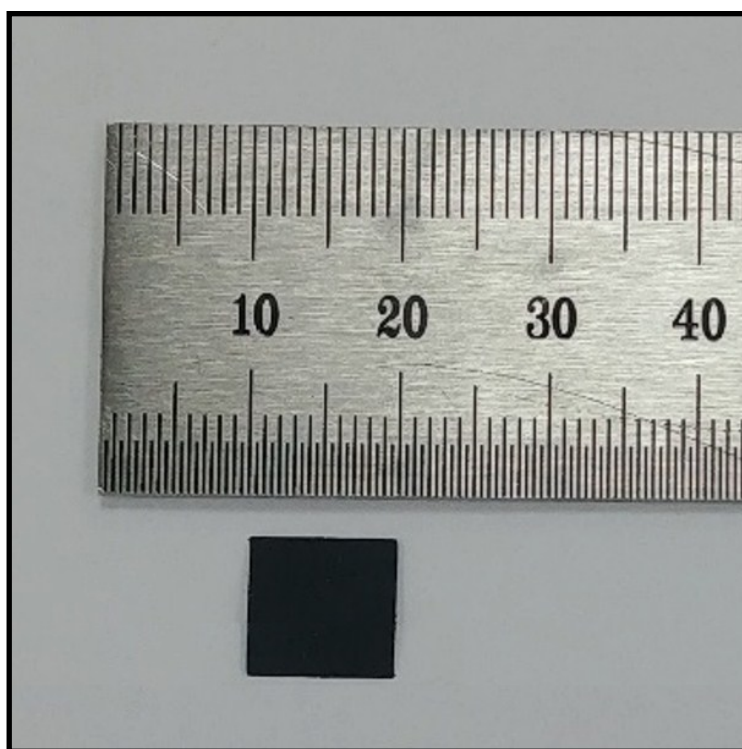

Fig. S4. Photograph of the CCO-11 (1 cm<sup>2</sup>) on Ni foam electrode by hot pressing.



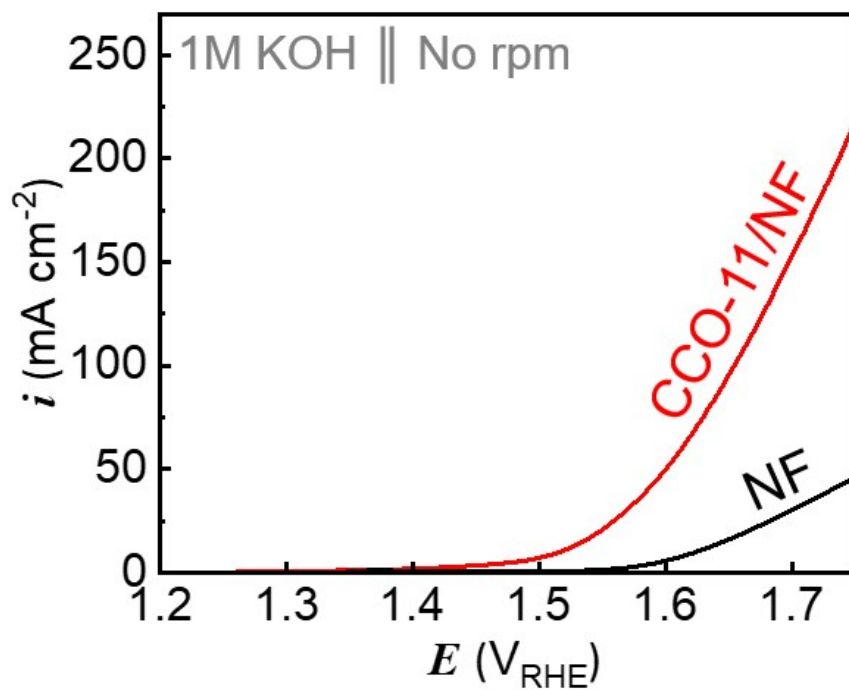

Fig. S5.. The half cell polarization curves of CCO-11/NF ( $10 \text{ mg cm}^{-2}$ ) and pure Ni foam (NF) in 1 M KOH.

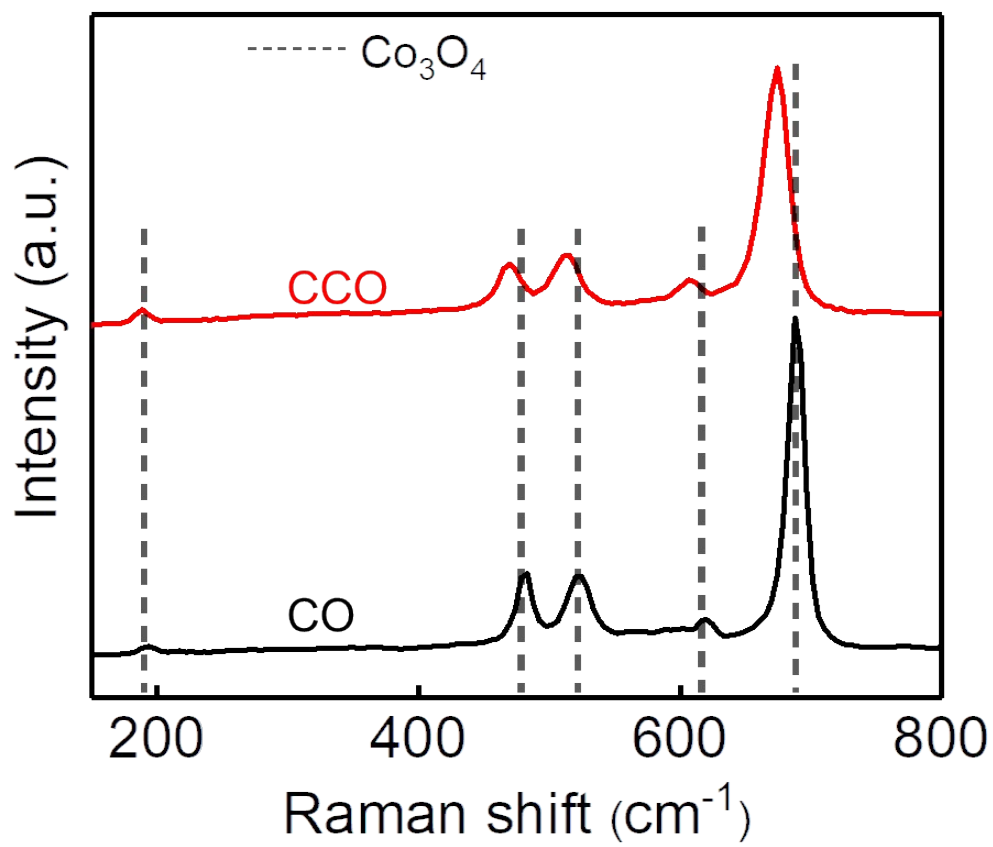

Fig. S6. The Raman spectra of CCO and CO.

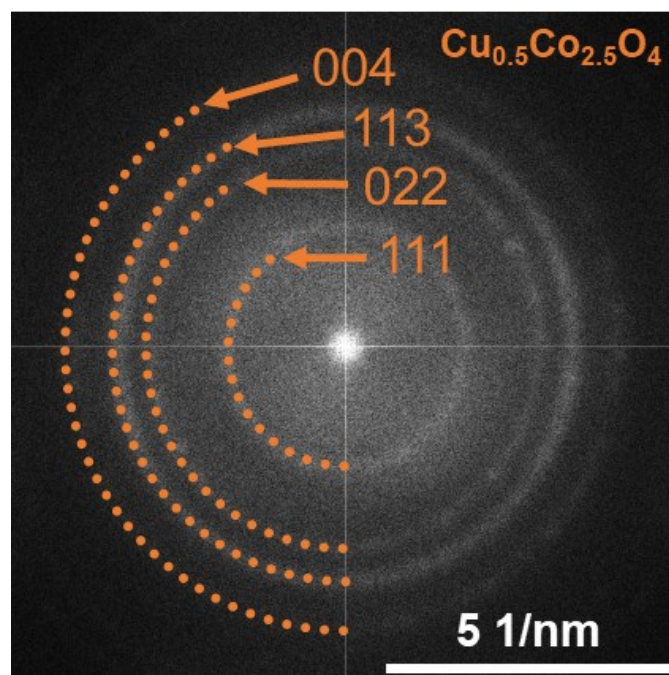

Fig. S7. The SAED pattern of the CCO-11 catalyst.

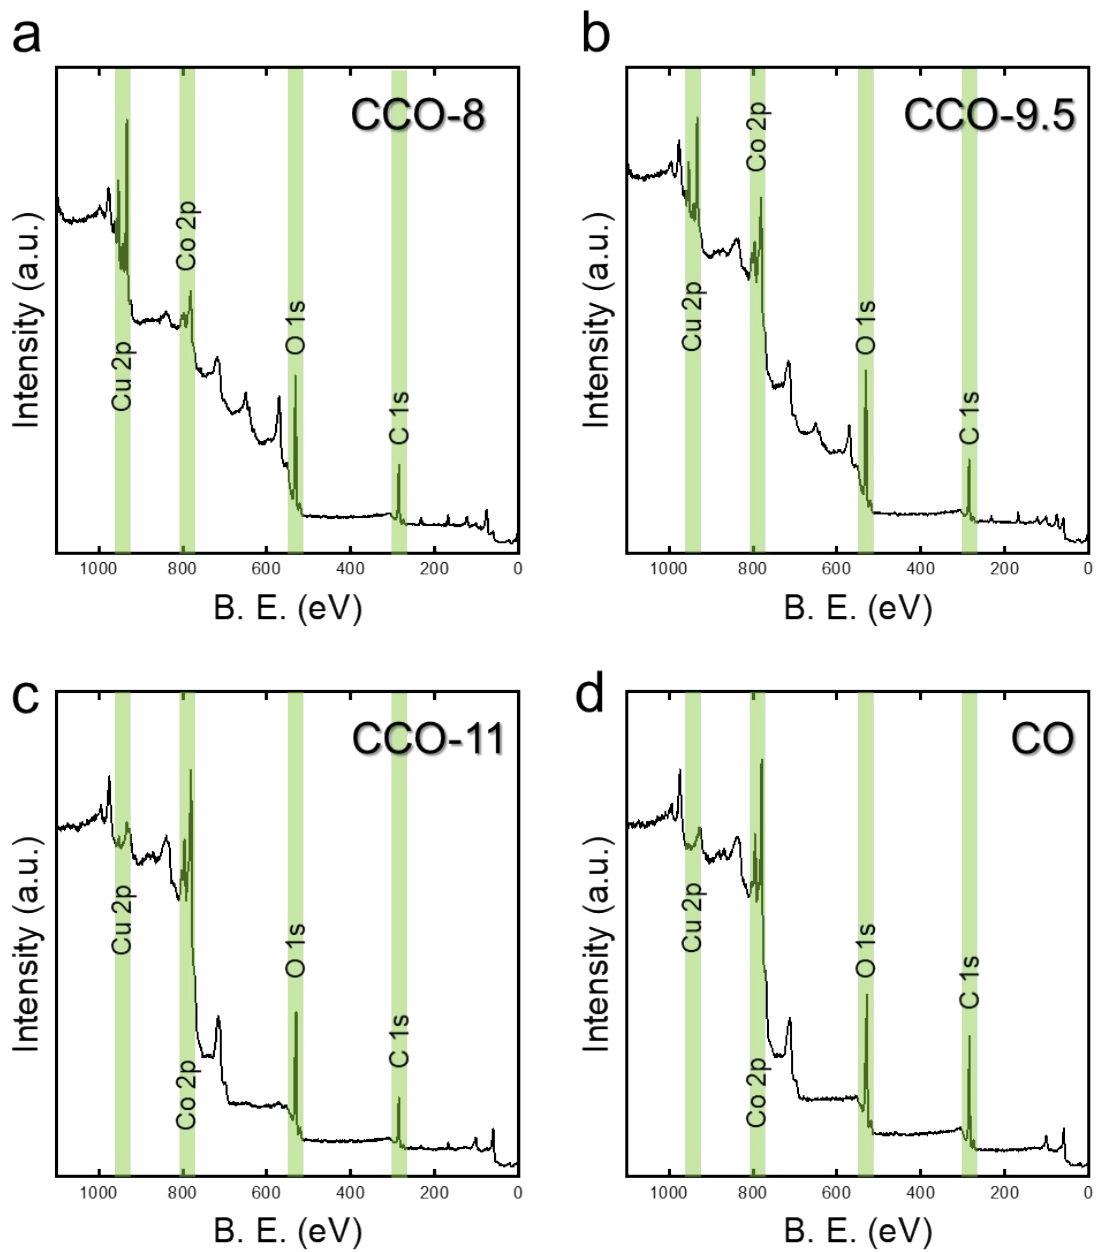

Fig. S8. XPS survey spectra of CCO-8, CCO-9.5, CCO-11 and CO.

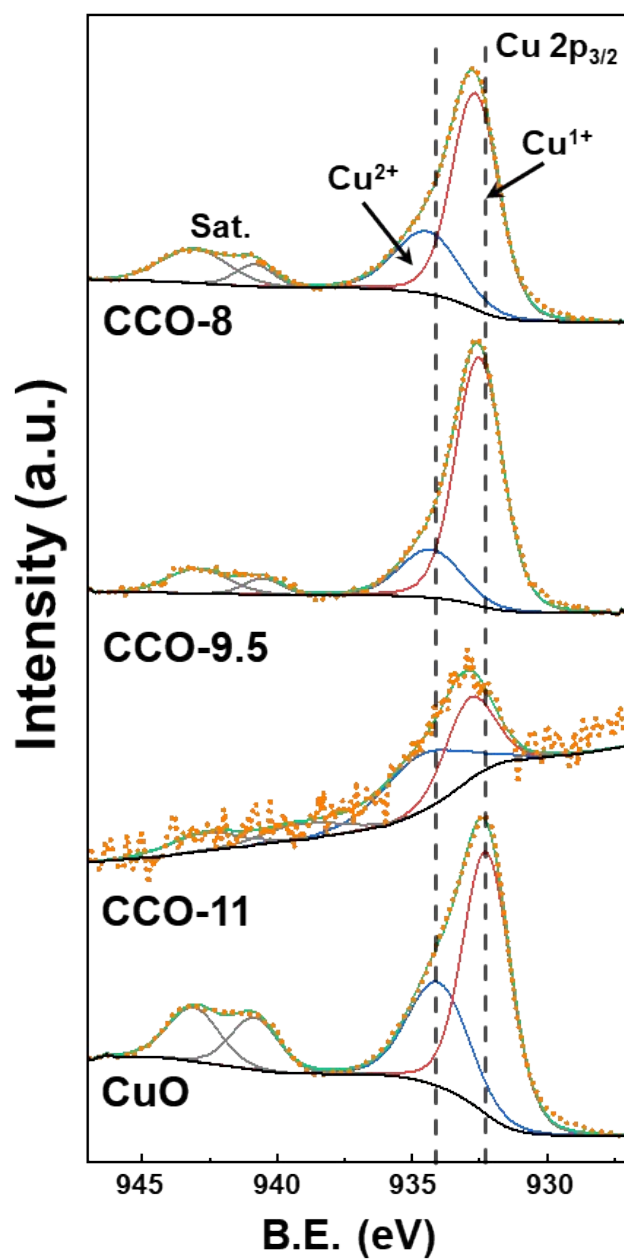

Fig. S9. XPS spectra of Cu 2p<sub>3/2</sub> of the CuO, CCO-8, CCO-9.5 and CCO-11.

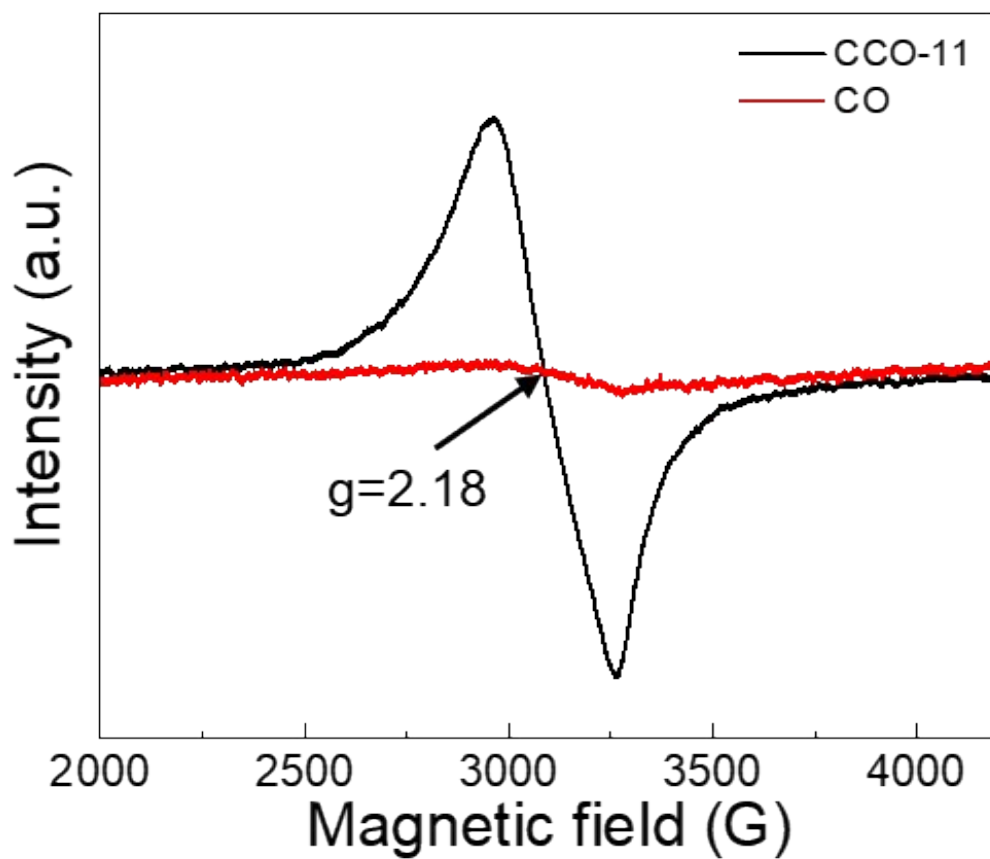

Fig. S10. Room-temperature EPR spectra of CCO-11 and CO.

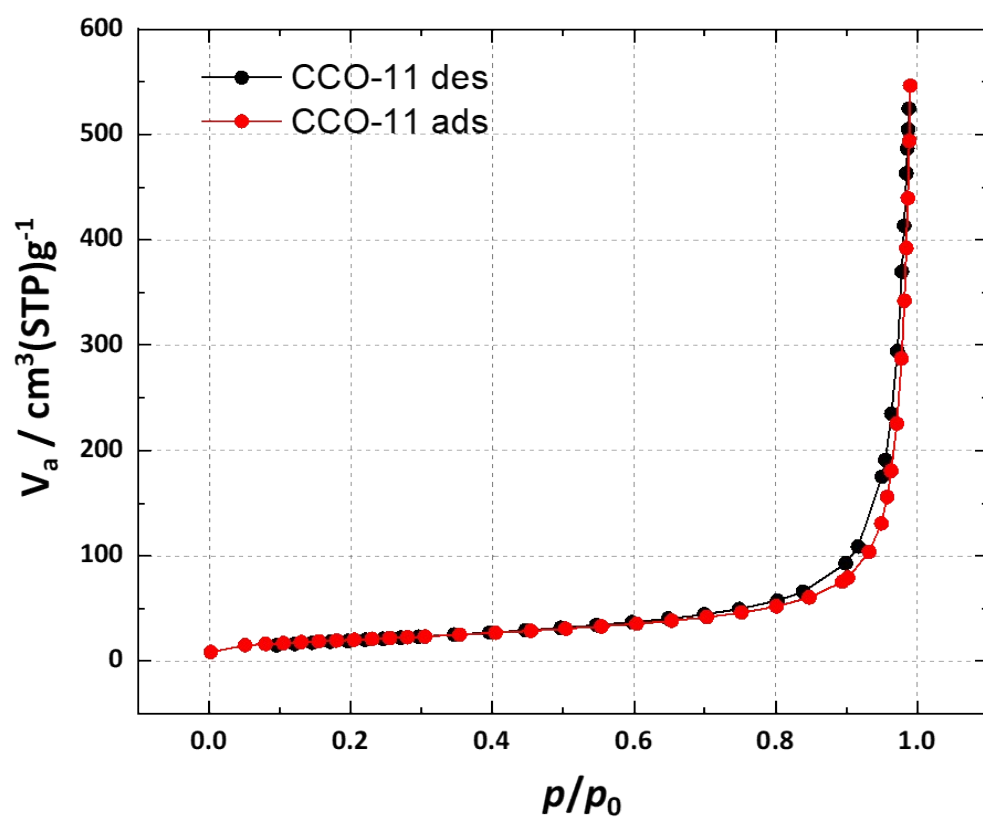

Fig. S11. Nitrogen adsorption/desorption isotherm and the BET surface area analysis of CCO-11

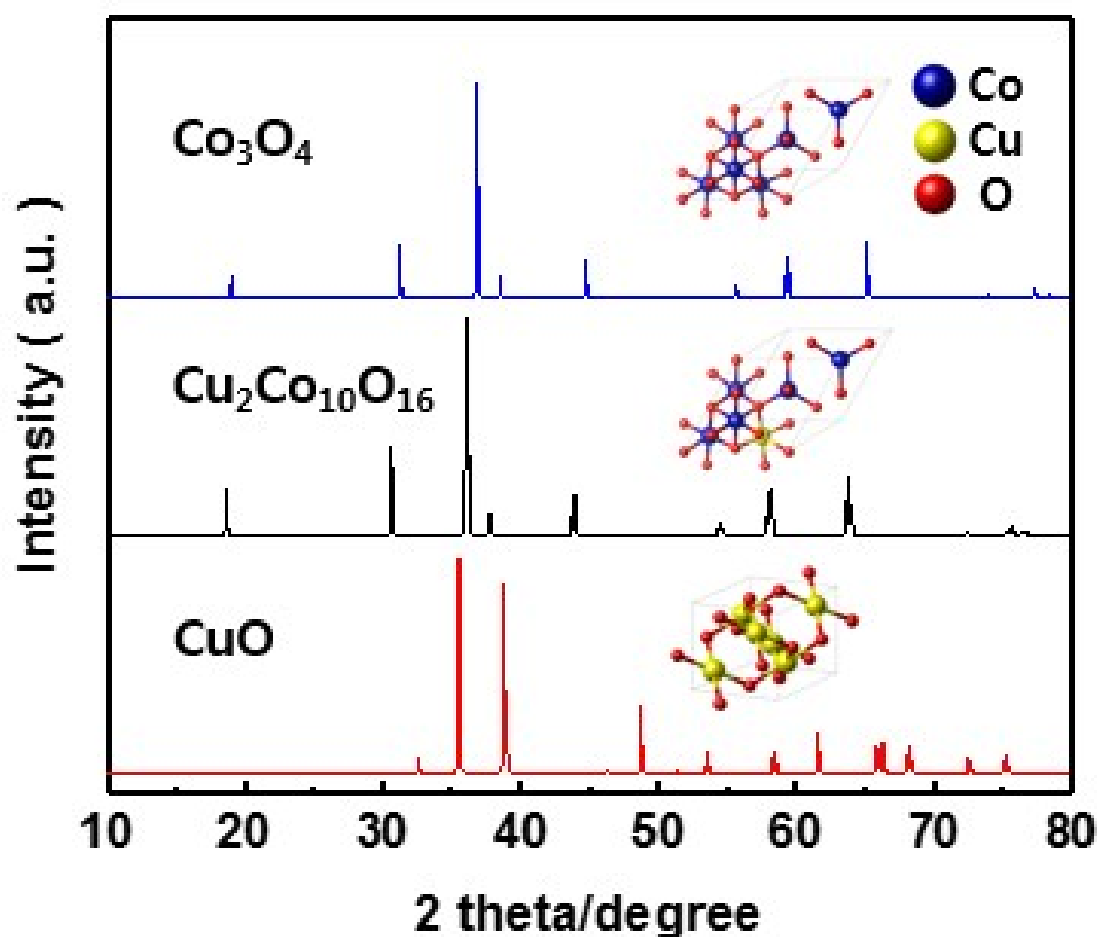

Fig. S12. X-ray diffraction (XRD) patterns of (blue line) for bulk  $\text{Co}_3\text{O}_4$  in the symmetric group of  $\text{Fd}3\text{m}$  (ICSD #69374). (black line)  $\text{Cu}_2\text{Co}_{10}\text{O}_{16}$  selected from the configurations in models considering the composition of Cu, Co and O in lattice having symmetric group of  $\text{Fd-}3\text{mZ}$  (ICSD #150806), and (red line) for bulk  $\text{CuO}$  in the symmetric group of  $\text{C}12/\text{c}1$  (ICSD #69094), respectively.



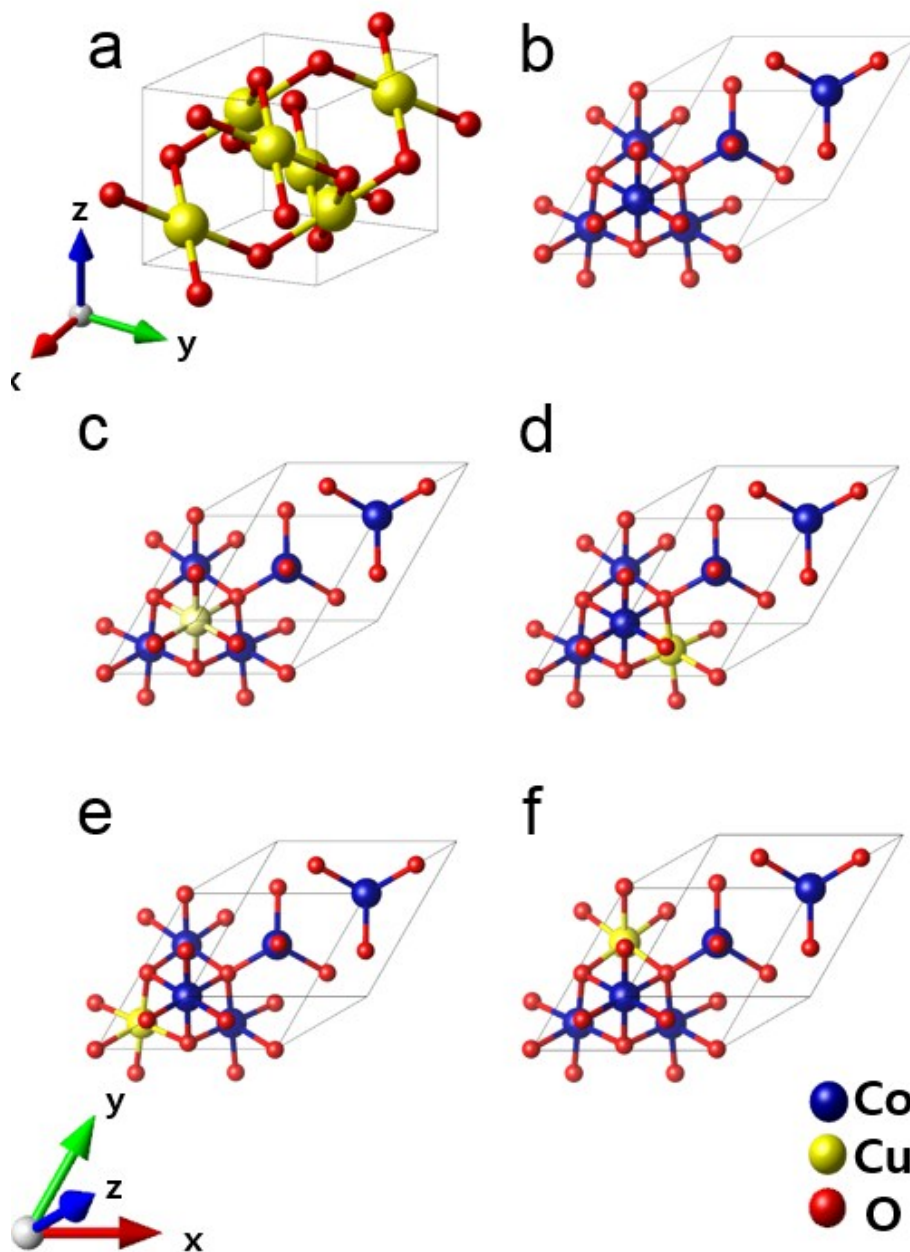

Fig. S13. Designed CuO in the symmetric group of  $C_{12/c1}$  (ICSD #69094),  $Co_3O_4$  in the symmetric group of  $Fd\bar{3}m$  (ICSD #28158) and  $Cu_2Co_8O_{16}$  selected from the configurations in models considering the composition of Cu, Co, and O in lattice having a symmetric group of  $Fd\bar{3}mZ$  (ICSD #69374)

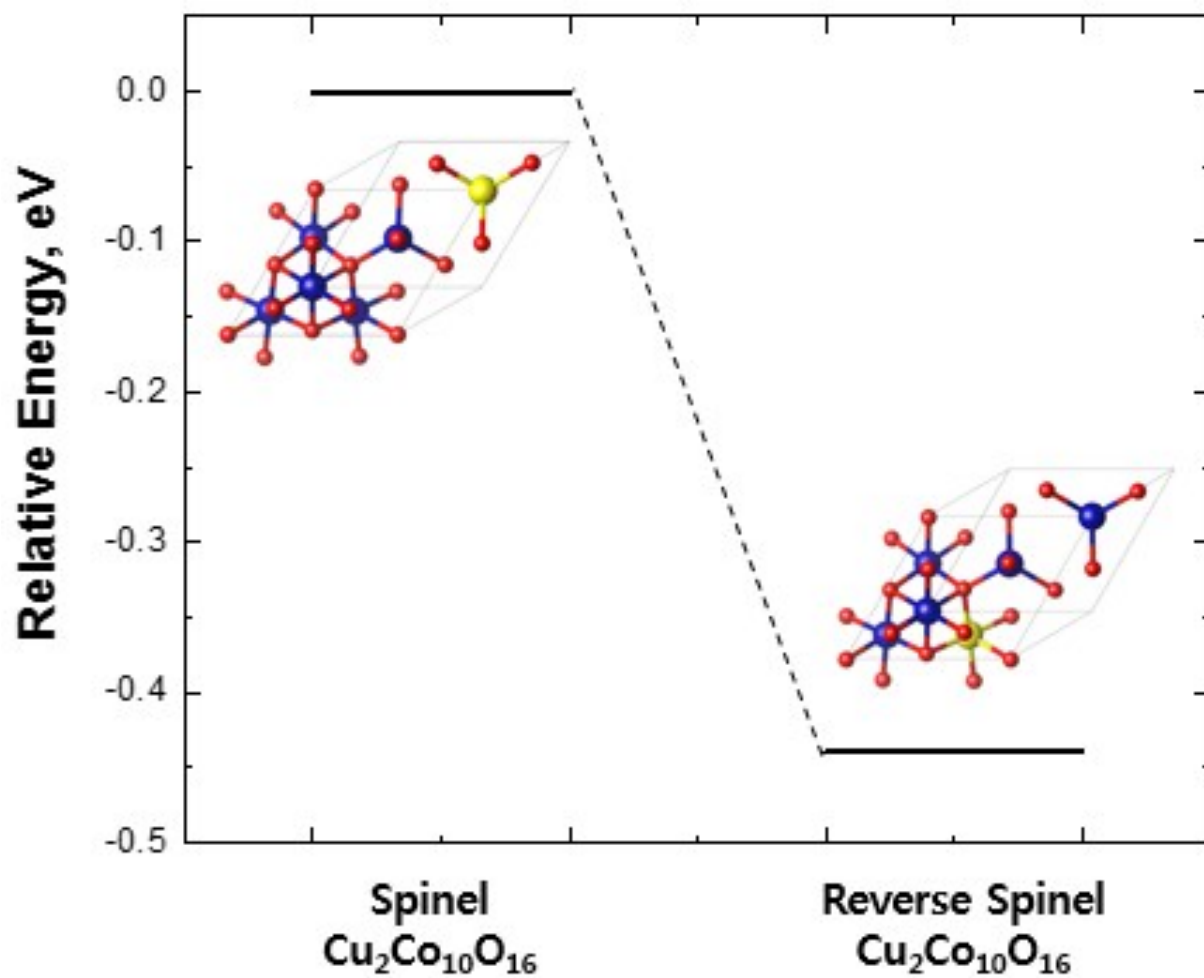

Fig. S14. Relative energy plot for the spinel and reverse spinel structures in  $\text{Cu}_2\text{Co}_{10}\text{O}_{16}$ .

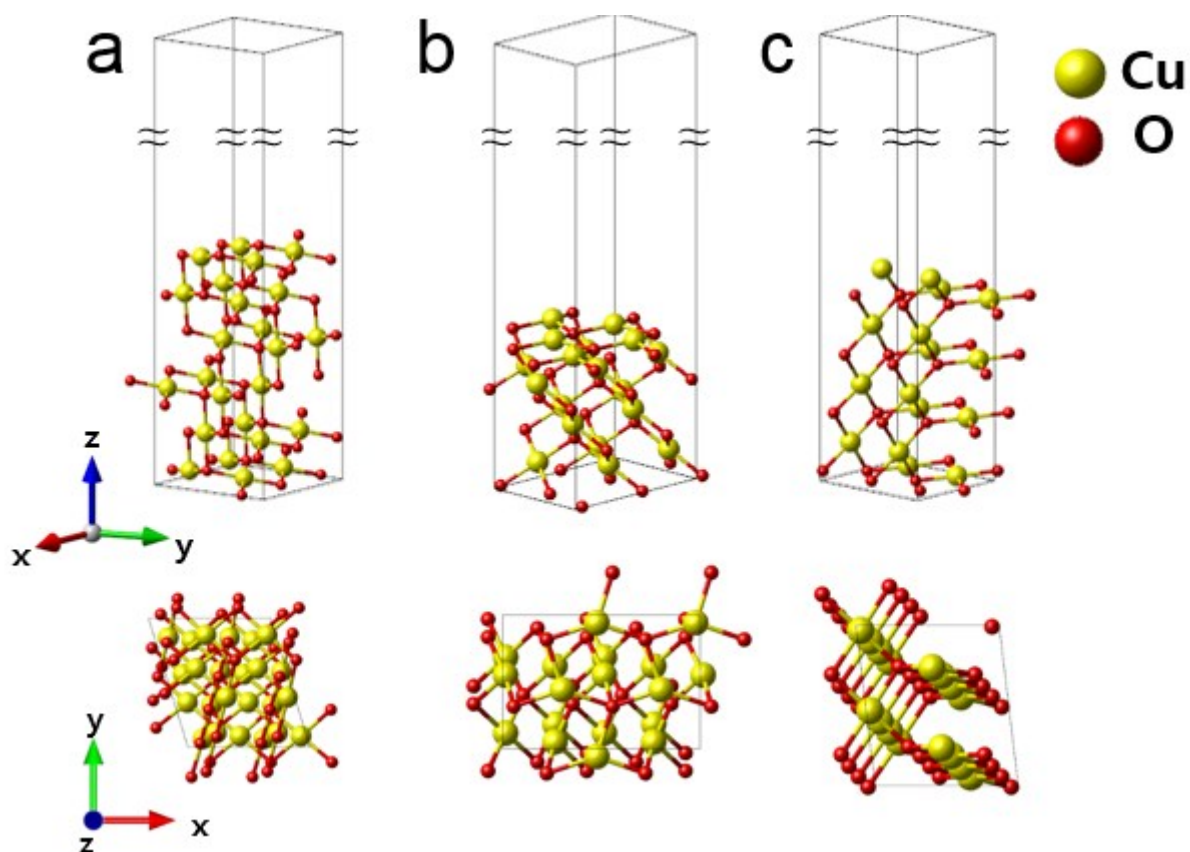

Fig. S15. (a) (001), (b) (110), and (c) (111) slab models of fully relaxed CuO. Based on the Z-coordination, bottom layers were fixed below 0.16, 0.12, and 0.16 for (001), (110), (111) of each slab model, respectively, from the bottom termination to be not included in the surface reaction. Rest atoms were fully relaxed.

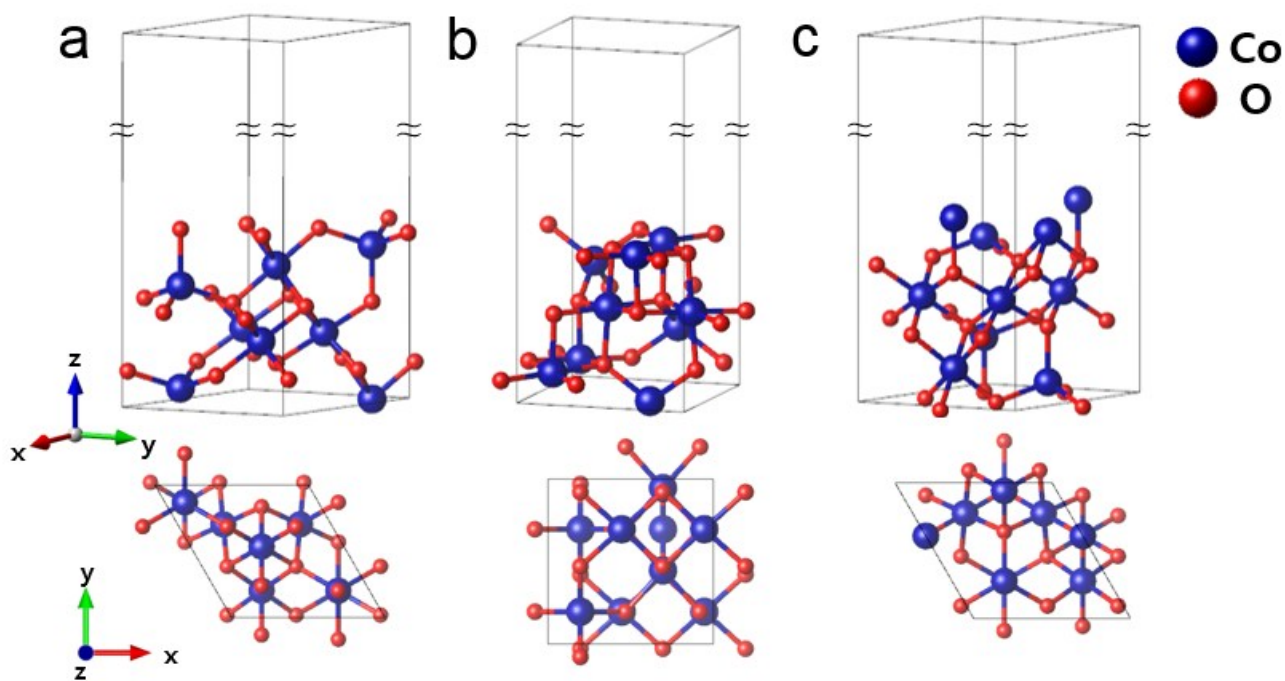

Fig. S16. (a) (001), (b) (110), and (c) (111) slab models of fully relaxed  $\text{Co}_3\text{O}_4$ . Based on the Z-coordination, bottom layers were fixed below 0.12, 0.12 and 0.15 for (001), (110), (111) of each slab model, respectively, from the bottom termination to be not included in the surface reaction. Rest atoms were fully relaxed.

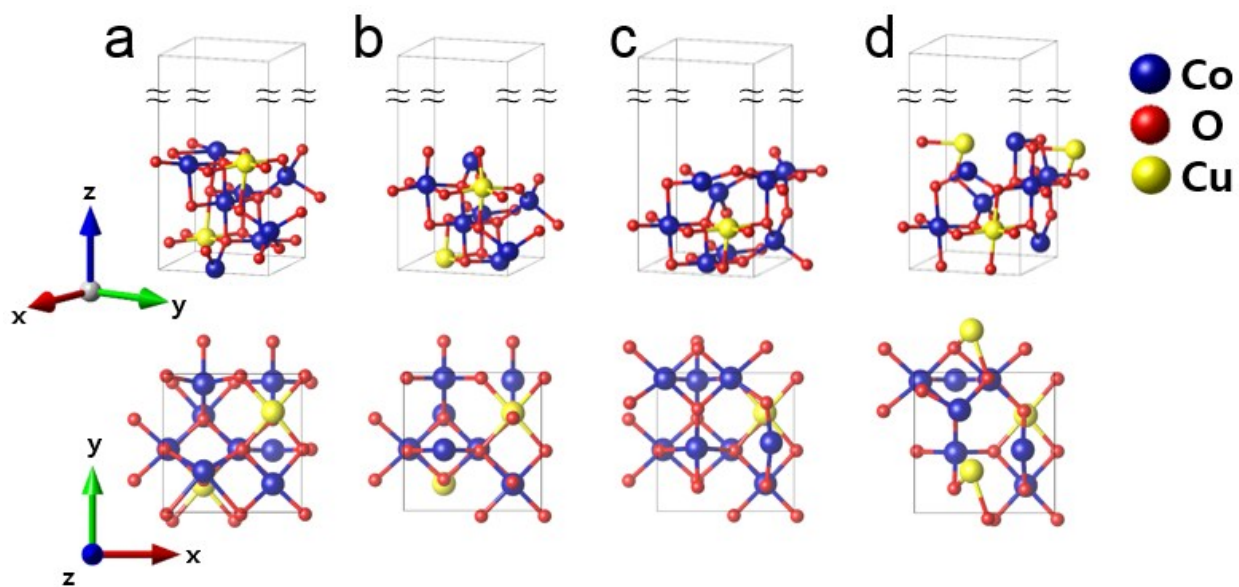

Fig. S 17. Designed slab models of four  $\text{Cu}_2\text{Co}_{10}\text{O}_{16}$  (110) with different exposed surfaces.

## References for Supplementary Information

- (1) J. Bao, X. Zhang, B. Fan, J. Zhang, M. Zhou, W. Yang, X. Hu, H. Wang, B. Pan, Y. Xie, *Ang. Chem. Int. Ed.*, 2015, **54**, 7399-7404.
- (2) W. Xu, F. Lyu, Y. Bai, A. Gao, J. Feng, Z. Cai, Y. Yin, *Nano Energy*, 2018, **43**, 110-116.
- (3) H. Hu, B. Guan, B. Xia, X.W. Lou, *J. Am. Chem. Soc.*, 2018, **137**, 5590-5595.
- (4) Y. Wang, T. Zhou, K. Jiang, P. Da, Z. Peng, J. Tang, B. Kong, W.B. Cai, Z. Yang, G. Zheng, *Adv. Energy Mater.*, 2014, **4**, 1400696.
- (5) Z. Liang, Z. Huang, H. Yuan, Z. Yang, C. Zhang, Y. Xu, W. Zhang, H. Zheng, R. Cao, *Chem. Sci.*, 2018, **9**, 6961-6968.
- (6) H.Y. Wang, Y.Y. Hsu, R. Chen, T.S. Chan, H.M. Chen, B. Liu, *Adv. Energy Mater.*, 2015, **5**, 1500091.
- (7) L. Han, X.Y. Yu, X.W. Lou, *Adv. Mater.*, 2016, **28**, 4601-4605.
- (8) A.L. Strickler, M.a. Escudero-Escribano, T.F. Jaramillo, *Nano Lett.*, 2017, **17**, 6040-6046.
- (9) X. Lu, Y.H. Ng, C. Zhao, *ChemSusChem*, 2014, **7**, 82-86.
- (10) X. Wu, K. Scott, *J. Power Sources*, 2012, **214**, 124-129.
- (11) Y.C. Cao, X. Wu, K. Scott, *Int. J. Hydrogen Energy*, 2012, **37**, 9524-9528.
- (12) C.C. Pavel, F. Cecconi, C. Emiliani, S. Santiccioli, A. Scaffidi, S. Catanorchi, M. Comotti, *Ang. Chem. Inter. Ed.*, 2014, **53**, 1378-1381.
- (13) L. Xiao, S. Zhang, J. Pan, C.X. Yang, M.L. He, L. Zhuang, J.T. Lu, *Energy Environ. Sci.*, 2012, **5**, 7869-7871.
- (14) X. Wu, K. Scott, *Int. J. Hydrogen Energy*, 2013, **38**, 3123-3129.
- (15) T. Pandiarajan, L.J. Berchmans, S. Ravichandran, *Rsc Adv.*, 2015, **5**, 34100-34108.
- (16) X. Wu, K. Scott, *J. Mater. Chem.*, 2011, **21**, 12344-12351.
- (17) Y. Leng, G. Chen, A.J. Mendoza, T.B. Tighe, M.A. Hickner, C.Y. Wang, *J. Am. Chem. Soc.*, 2012, **134**, 9054-9057.
- (18) J.E. Park, S. Kim, O.-H. Kim, C.-Y. Ahn, M.-J. Kim, S.Y. Kang, T.I. Jeon, J.-G. Shim, D.W. Lee, J.H. Lee, Y.-H. Cho, Y.-E. Sung, *Nano Energy*, 2019, **58**, 158-166.
- (19) M.K. Cho, H.Y. Park, H.J. Lee, H.J. Kim, A. Lim, D. Henkensmeier, S.J. Yoo, J.Y. Kim, S.Y. Lee, H.S. Park, J.H. Jang, *J. Power Sources*, 2018, **382**, 22-29.
